# Supplementary material for: Developmental Outcomes at 24 Months of Age in Toddlers Supplemented with Arachidonic Acid and Docosahexaenoic Acid: Results of a Double Blind Randomized, Controlled Trial
Source: MDPI journal article supplement (doi:10.3390/nu9090975), 2017-09-06
Supplement: s1 [file s1]

*Measures of attention:* The child was positioned on the parent's lap facing a table on which age appropriate toys were placed. Parents were asked to be quiet and avoid distracting or interacting with their child. The tester limited interaction to encouragement to play with the toy. Verbal communication with the child followed a standard script, and the sessions were timed with a stopwatch and recorded by a video camcorder, which also recorded elapsed time for detailed coding. In the distractibility task, show clips on a TV in the periphery of the play area were used as the distraction. All videos were viewed and analyzed by coders blinded to the infant's study group and all other information about the child and family. Videos were coded using Observer XT 12 (Noldus Information Technology). For the single-object task and the multiple-objects task, mean duration and total duration of looking at the toy, total number of looks to the toy and total number of inattention episodes were measured. For the distractibility task percentage of duration the child turned away from the toy, latency to turn from the toy to the distractor, and the duration of looking at the distractor were calculated.

**Table S1. Effect of ARA and DHA supplement on attention and distractibility measures at age 18 and 24 months**

|                                                      | Supplement   | Placebo      | <i>p</i> |
|------------------------------------------------------|--------------|--------------|----------|
| <b>18 months of age</b>                              |              |              |          |
| Single object mean duration at toy, seconds          | 16.9 (10.5)  | 17.9 (9.8)   | 0.619    |
| Single object total duration at toy, seconds         | 222.9 (56.7) | 239.7 (56.3) | 0.158    |
| Single object total looks at toy, counts             | 16.0 (6.5)   | 15.4 (5.8)   | 0.633    |
| Single object total inattention episode, count       | 14.5 (6.4)   | 14.4 (5.8)   | 0.930    |
| Multiple objects mean duration at toy, seconds       | 225.9 (63.5) | 240.2 (44.1) | 0.209    |
| Multiple objects total duration at toy, seconds      | 24.4 (15.0)  | 24.6 (16.4)  | 0.944    |
| Multiple objects total looks at toy, counts          | 11.2 (5.4)   | 12.2 (4.7)   | 0.392    |
| Multiple objects total inattention episode, counts   | 8.5 (5.4)    | 9.8 (4.9)    | 0.227    |
| Distractibility total duration TV/total duration toy | 36.3 (19.5)  | 34.8 (16.4)  | 0.730    |
| Distractibility latency, seconds                     | 14.0 (8.3)   | 15.5 (10.2)  | 0.509    |
| Distractibility total looks at TV, counts            | 12.8 (3.3)   | 12.5 (3.7)   | 0.725    |
| <b>24 months of age</b>                              |              |              |          |
| Single object mean duration at toy, seconds          | 23.7 (15.6)  | 25.7 (17.4)  | 0.571    |
| Single object total duration at toy, seconds         | 236.6 (55.9) | 248.0 (45.5) | 0.304    |
| Single object total looks at toy, counts             | 12.5 (5.1)   | 12.5 (5.4)   | 0.974    |
| Single object total inattention episode, counts      | 10.7 (5.4)   | 10.8 (5.4)   | 0.893    |
| Multiple objects mean duration at toy, seconds       | 26.0 (18.3)  | 24.8 (13.2)  | 0.729    |
| Multiple objects total duration at toy, seconds      | 222.3 (74.2) | 239.9 (47.4) | 0.195    |
| Multiple objects total looks at toy, counts          | 10.9 (5.2)   | 11.9 (5.2)   | 0.411    |
| Multiple objects total inattention episode, counts   | 8.1 (4.5)    | 8.7 (4.7)    | 0.578    |
| Distractibility total duration TV/total duration toy | 35.7 (28.8)  | 39.5 (24.3)  | 0.594    |
| Distractibility latency, seconds                     | 20.7 (10.4)  | 22.7 (18.3)  | 0.625    |
| Distractibility total looks at TV, counts            | 11.1 (3.5)   | 11.3 (3.9)   | 0.824    |

Abbreviations: ARA, arachidonic acid; DHA, docosahexaenoic acid. Data presented as mean (SD). Between group comparisons by unadjusted general linear models.

**Table S2.** Major fatty acids levels of children at baseline and age 24 months

| Fatty Acid    | Baseline                |            |          | Age 24 months |            |            |        |
|---------------|-------------------------|------------|----------|---------------|------------|------------|--------|
|               | Supplement              | Placebo    | <i>p</i> | Supplement    | Placebo    | <i>p</i>   |        |
| Palmitic acid |                         |            |          | Palmitic acid |            |            |        |
| RBC PE        | 11.6 (1.0) <sup>2</sup> | 12.0 (0.8) | 0.046    | RBC PE        | 11.4 (0.8) | 11.7 (0.8) | 0.144  |
| RBC PC        | 35.5 (1.7)              | 36.0 (1.6) | 0.099    | RBC PC        | 35.2 (1.8) | 36.0 (2.4) | 0.070  |
| Plasma        | 30.5 (2.2)              | 30.3 (2.1) | 0.599    | Plasma        | 30.2 (2.1) | 30.3 (1.2) | 0.686  |
| Stearic acid  |                         |            |          | Stearic acid  |            |            |        |
| RBC PE        | 5.68 (0.6)              | 5.76 (0.5) | 0.479    | RBC PE        | 5.88 (0.6) | 5.83 (0.6) | 0.652  |
| RBC PC        | 13.5 (1.0)              | 13.2 (1.2) | 0.242    | RBC PC        | 13.7 (1.1) | 13.0 (1.3) | 0.010  |
| Plasma        | 16.9 (1.3)              | 16.7 (1.3) | 0.446    | Plasma        | 16.8 (1.1) | 16.6 (1.5) | 0.326  |
| Oleic acid    |                         |            |          | Oleic acid    |            |            |        |
| RBC PE        | 14.8 (1.1)              | 15.0 (1.3) | 0.431    | RBC PE        | 13.6 (1.0) | 14.7 (1.1) | <0.001 |
| RBC PC        | 16.1 (1.3)              | 16.0 (1.1) | 0.568    | RBC PC        | 15.6 (1.2) | 15.7 (1.8) | 0.734  |
| Plasma        | 10.4 (1.3)              | 10.5 (1.3) | 0.681    | Plasma        | 9.48 (1.4) | 10.4 (1.0) | <0.001 |

Abbreviations: PC, phosphatidylcholine; PE, phosphatidylethanolamine. Data presented as mean (SD). Between group differences determined by t-tests.
